# Supplementary material
Source: publisher site journal article supplement (https://kjim.org/upload/media/kjim-2023-311-Supplementary-Fig-5.pdf)
Supplement: Supplementary file 1 [file kjim-2023-311-Supplementary-Fig-5.pdf]

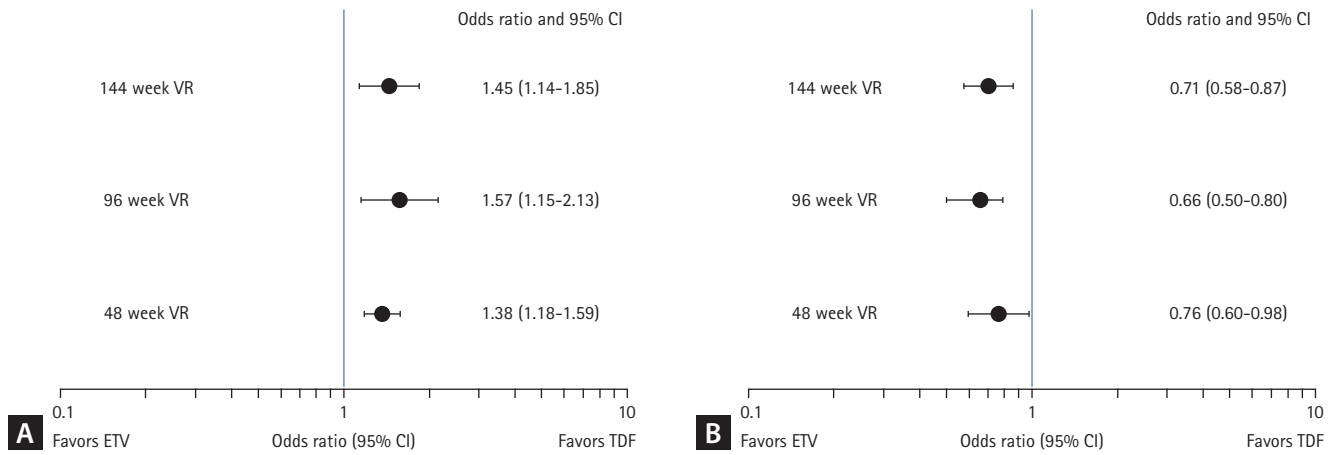

**Supplementary Figure 5.** Year-wise comparison of ETV and TDF. (A) VR. (B) BR. CI, confidence interval; ETV, entecavir; TDF, tenofovir disoproxil fumarate; VR, virologic response; BR, biochemical response.
